# Supplementary material for: Nestling activity levels during begging behaviour predicts activity level and body mass in adulthood
Source: PeerJ. 2014 Sep 16;2:e566. doi: 10.7717/peerj.566 (PMC4179387; doi:10.7717/peerj.566)
Supplement: Supplemental Information 1 [file peerj-02-566-s001.xlsx]

## Sheet: categories
category	details
nestling_movement_data_raw_ALL	All nestlings including those that died before the activity test
day5or7	Age of nestling (day 5 (1) or day 7 (2))
trial	Trial number (1st, 2nd or 3rd)
tongue_movements	Height of the head from the nest floor, measured in 'head width' using each nestling's head for own measurement (zero to three heads)
head movements	Number of times the tongue moved from one side of the mouth to the other per second (zero to 4 times)
nestling_movement_raw_data	Only nestlings that reached the activity test as adults
day5or7	Age of nestling (day 5 (1) or day 7 (2))
trial	Trial number (1st, 2nd or 3rd)
tongue_movements	Height of the head from the nest floor, measured in 'head width' using each nestling's head for own measurement (zero to three heads)
head movements	Number of times the tongue moved from one side of the mouth to the other per second (zero to 4 times)
adult_dataset	data from adults
yes	participated in the adult activity test yes (1) or no (0)
cage	The pair ID of an individual during the adult activity test.
adult_activity_mmps	Mean movements made per 30s interval (out of 66 intervals at the start of every 10 minute period over the course of 1 day) in adult activity trial
foster	Foster nest ID
gen	Genetic nest ID
tongue_movements_mean	Mean tongue movements score as a nestling
head_movements_mean	Mean head movements score as a nestling
adult_tarsus	Tarsus length in mm as a adult
mass_28thmay	Mass in grams when measured as an adult

## Sheet: nestling_data_raw_ALL
ring	reached_adult_test	sex	day5or7	trial	tongue_movements	head_movements
429	1	f	1	1	1.5	1
429	1	f	1	2	1.5	1
429	1	f	1	3	2	1
429	1	f	2	1	2	0
429	1	f	2	2	2	0
429	1	f	2	3	2	0
435	1	f	1	1	2	1
435	1	f	1	2	2	0
435	1	f	1	3	1	0
435	1	f	2	1	1	0
435	1	f	2	2	1	0
435	1	f	2	3	1	1
438	1	f	1	1	3	2
438	1	f	1	2	3.5	1
438	1	f	1	3	3	2
438	1	f	2	1	1	1
438	1	f	2	2	3	2
438	1	f	2	3	2.5	1
445	1	f	1	1	2	2
445	1	f	1	2	2	2
445	1	f	1	3	2	1.5
445	1	f	2	1	1	0.5
445	1	f	2	2	2	2
445	1	f	2	3	2	2
447	1	f	1	1	0	0
447	1	f	1	2	1.5	0
447	1	f	1	3	1	0
447	1	f	2	1	2	0
447	1	f	2	2	0	0
447	1	f	2	3	1	0
461	1	f	1	1	3	2.5
461	1	f	1	2	2	0
461	1	f	1	3	0	0
461	1	f	2	1	1	0
461	1	f	2	2	0	1
461	1	f	2	3	1	0
464	1	f	1	1	3.5	2
464	1	f	1	2	1	2
464	1	f	1	3	1	0
464	1	f	2	1	0	0
464	1	f	2	2	0	0
464	1	f	2	3	1	0
506	1	f	1	1	0	0
506	1	f	1	2	0	0
506	1	f	1	3	0	0
506	1	f	2	1	1.5	1.5
506	1	f	2	2	1.5	0
506	1	f	2	3	2	0
508	1	f	1	1	0	0
508	1	f	1	2	2	1
508	1	f	1	3	1	0
508	1	f	2	1	3	0
508	1	f	2	2	1.5	0
508	1	f	2	3	2	0
509	1	f	1	1	0	2
509	1	f	1	2	4	2
509	1	f	1	3	2	3
509	1	f	2	1	2	0
509	1	f	2	2	2	2
509	1	f	2	3	3	2.5
558	1	f	1	1	0.5	0
558	1	f	1	2	0.5	1
558	1	f	2	1	1	0
558	1	f	2	2	0	0
558	1	f	2	3	1	0
559	1	f	1	1	0	0
559	1	f	1	2	0	0
559	1	f	2	1	0	0
559	1	f	2	2	0	0
559	1	f	2	3	0	0
566	1	f	1	1	0	0
566	1	f	1	2	0	0
566	1	f	1	3	0	0
566	1	f	2	1	1.5	0
566	1	f	2	2	1.5	0
566	1	f	2	3	1.5	0
571	1	f	1	1	3	0
571	1	f	1	2	2	0
571	1	f	1	3	1.5	1
571	1	f	2	1	1.5	0
571	1	f	2	2	3	2
571	1	f	2	3	0	0
595	1	f	1	1	0	0
595	1	f	1	2	1	0
595	1	f	1	3	0	0
595	1	f	2	1	0	0
595	1	f	2	2	0	0
595	1	f	2	3	0	0
862	1	f	1	1	1	1
862	1	f	1	2	1	0
862	1	f	1	3	1	0
862	1	f	2	1	3	2
862	1	f	2	2	3	2
862	1	f	2	3	2	1
910	1	f	1	1	1	0
910	1	f	1	2	0	0
910	1	f	1	3	2	1
910	1	f	2	1	1	1
910	1	f	2	2	2	2
910	1	f	2	3	1	2
926	1	f	1	1	2.5	2
926	1	f	1	2	2.5	3
926	1	f	1	3	2.5	1
926	1	f	2	1	3	2
926	1	f	2	2	3	1
926	1	f	2	3	3	2
1053	1	f	1	1	2	1
1053	1	f	1	2	2	1
1053	1	f	1	3	2	1
1053	1	f	2	1	1	0
1053	1	f	2	2	2	1
1053	1	f	2	3	1	0
427	1	m	1	1	2.5	1
427	1	m	1	2	2.5	1
427	1	m	1	3	2.5	1
427	1	m	2	1	2	1
427	1	m	2	2	1	0
427	1	m	2	3	1	0
431	1	m	1	1	1	0
431	1	m	1	2	0	0
431	1	m	1	3	0	0
431	1	m	2	1	1	0
431	1	m	2	2	2	1
431	1	m	2	3	0	0
432	1	m	1	1	0	0
432	1	m	1	2	1	0
432	1	m	1	3	0	0
432	1	m	2	1	0	0
432	1	m	2	2	0	0
432	1	m	2	3	0	0
433	1	m	1	1	0	0
433	1	m	1	2	2	2
433	1	m	1	3	0	2
433	1	m	2	1	0	0
433	1	m	2	2	0	0
433	1	m	2	3	0	0
436	1	m	1	1	2	2
436	1	m	1	2	1.5	0
436	1	m	1	3	2	0
436	1	m	2	1	2	2
436	1	m	2	2	3	2
436	1	m	2	3	3	2
440	1	m	1	1	3	1
440	1	m	1	2	3	3
440	1	m	1	3	2.5	1
440	1	m	2	1	2	1
440	1	m	2	2	2.5	2
440	1	m	2	3	2	0
441	1	m	1	1	2	1
441	1	m	1	2	2	1
441	1	m	1	3	2	1
441	1	m	2	1	3	2
441	1	m	2	2	3	2
441	1	m	2	3	3	1
448	1	m	1	1	2.5	2
448	1	m	1	2	3.5	3
448	1	m	1	3	3	2
448	1	m	2	1	4	3
448	1	m	2	2	4	3
448	1	m	2	3	3	2
449	1	m	1	1	1	0
449	1	m	1	2	1	0
449	1	m	1	3	1.5	0
449	1	m	2	1	2	0
449	1	m	2	2	3	1.5
449	1	m	2	3	2	0
451	1	m	1	1	2	2
451	1	m	1	2	3.5	2.5
451	1	m	1	3	3	2
451	1	m	2	1	3	1
451	1	m	2	2	2.5	0.5
451	1	m	2	3	2.5	1
463	1	m	1	1	2	0.5
463	1	m	1	2	2	1
463	1	m	1	3	2	0
463	1	m	2	1	0	0
463	1	m	2	2	0	0
463	1	m	2	3	1	0
466	1	m	1	1	2	2
466	1	m	1	2	1.5	0
466	1	m	1	3	0	0
466	1	m	2	1	1.5	0
466	1	m	2	2	1.5	0
466	1	m	2	3	1.5	0
507	1	m	1	1	0	0
507	1	m	1	2	2	0
507	1	m	1	3	1	0
507	1	m	2	1	3	1
507	1	m	2	2	2.5	0
507	1	m	2	3	3	1
551	1	m	1	1	0	0
551	1	m	1	2	3	0
551	1	m	1	3	0	0
551	1	m	2	1	2.5	1.5
551	1	m	2	2	0	0
551	1	m	2	3	3	0
562	1	m	1	1	1	0
562	1	m	1	2	1.5	0
562	1	m	1	3	1.5	0
562	1	m	2	1	1	0
562	1	m	2	2	2	1
562	1	m	2	3	0	1
568	1	m	1	1	2	0
568	1	m	1	2	2	0
568	1	m	1	3	2	1
568	1	m	2	1	3.5	2
568	1	m	2	2	3.5	2
568	1	m	2	3	3.5	2
569	1	m	1	1	1.5	2
569	1	m	1	2	1.5	2
569	1	m	1	3	1	1
569	1	m	2	1	3	2.5
569	1	m	2	2	3	2
569	1	m	2	3	2	2.5
572	1	m	1	1	2	1
572	1	m	1	2	1	0
572	1	m	1	3	1	1
572	1	m	2	1	1	1
572	1	m	2	2	2	2
572	1	m	2	3	0	0
573	1	m	1	1	2.5	2
573	1	m	1	2	2	2
573	1	m	1	3	2.5	2
573	1	m	2	1	0	0
573	1	m	2	2	1.5	0
574	1	m	1	1	1	1
574	1	m	1	2	1	1
574	1	m	1	3	0	1
574	1	m	2	1	3	3
574	1	m	2	2	3	3
583	1	m	1	1	2	0
583	1	m	1	2	1	0
583	1	m	1	3	1	0
583	1	m	2	1	0.5	0
583	1	m	2	2	1.5	0
583	1	m	2	3	2	0
586	1	m	1	1	2.5	1
586	1	m	2	1	0.5	0
586	1	m	2	2	1.5	0
586	1	m	2	3	1	0
588	1	m	1	1	2.5	2
588	1	m	1	2	2	1
588	1	m	1	3	2	2
588	1	m	2	1	3	2
588	1	m	2	2	3	2
588	1	m	2	3	3	2
589	1	m	1	1	0	0
589	1	m	1	2	0	0
589	1	m	2	1	0	0
589	1	m	2	2	0	0
589	1	m	2	3	0	0
590	1	m	1	1	0	0
590	1	m	1	2	0	0
590	1	m	2	1	0	0
590	1	m	2	2	0	0
590	1	m	2	3	1.5	0
596	1	m	1	1	2	2
596	1	m	1	2	2	2
596	1	m	1	3	2	2
596	1	m	2	1	2	1
596	1	m	2	2	2	1.5
596	1	m	2	3	0	1.5
863	1	m	1	1	1	1
863	1	m	1	2	1	1
863	1	m	1	3	0	0
863	1	m	2	1	2	2
863	1	m	2	2	2	2
863	1	m	2	3	3	2
864	1	m	1	1	0	0
864	1	m	1	2	0	0
864	1	m	1	3	0	0
864	1	m	2	1	2	0
864	1	m	2	2	2	1
864	1	m	2	3	2	1
884	1	m	1	1	2	0
884	1	m	1	2	2	1
884	1	m	1	3	2	0
884	1	m	2	1	1	0
884	1	m	2	2	1	0
884	1	m	2	3	2	0
894	1	m	1	1	0	0
894	1	m	1	2	1	1
894	1	m	1	3	2	1
894	1	m	2	1	2	2
894	1	m	2	2	2	2
894	1	m	2	3	1	1
2	.	f	1	1	1	0
2	.	f	1	2	1	0
2	.	f	1	3	1	0
2	.	f	2	1	1	0
2	.	f	2	2	1	2
2	.	f	2	3	1	1
3	.	f	1	1	1.5	0
3	.	f	1	2	1.5	0
3	.	f	1	3	1	0
3	.	f	2	1	1	0
3	.	f	2	2	2	0
3	.	f	2	3	2	0
255	.	f	1	1	2.5	1
255	.	f	1	2	3	1
255	.	f	1	3	2	1
255	.	f	2	1	1	1
255	.	f	2	2	0	0
255	.	f	2	3	3	1
407	.	f	1	1	0	0
407	.	f	1	2	0	0
407	.	f	2	1	0	0
407	.	f	2	2	0	0
407	.	f	2	3	0	0
425	.	f	1	1	2	2
425	.	f	1	2	2	2
425	.	f	1	3	2.5	2
425	.	f	2	1	4	3
425	.	f	2	2	2	2
425	.	f	2	3	3	2
430	.	f	1	1	0	0
430	.	f	1	2	0.5	0
430	.	f	1	3	0.5	0
430	.	f	2	1	0	0
430	.	f	2	2	0	0
430	.	f	2	3	0	0
434	.	f	1	1	1	1
434	.	f	1	2	2	0
434	.	f	1	3	1.5	0
434	.	f	2	1	3	0
434	.	f	2	2	2	1
434	.	f	2	3	2	1
439	.	f	1	1	4	4
439	.	f	1	2	4	4
439	.	f	1	3	4	4
439	.	f	2	1	2	3
439	.	f	2	2	3	3
439	.	f	2	3	2.5	2
442	.	f	1	1	1	0
442	.	f	1	2	0	0
442	.	f	1	3	0	0
442	.	f	2	1	1.5	1
442	.	f	2	2	1	1
442	.	f	2	3	1.5	1
443	.	f	1	1	0	0
443	.	f	1	2	0	0
443	.	f	1	3	1	0
443	.	f	2	1	1.5	0
443	.	f	2	2	2	0
443	.	f	2	3	2	0
444	.	f	1	1	2	2
444	.	f	1	2	2	1
444	.	f	1	3	2	0
444	.	f	2	1	2.5	2
444	.	f	2	2	2.5	2.5
444	.	f	2	3	2.5	2
446	.	f	1	1	1	0
446	.	f	1	2	0	0
446	.	f	1	3	1	0
446	.	f	2	1	2	1
446	.	f	2	2	1	0
446	.	f	2	3	2	3
450	.	f	1	1	2	1
450	.	f	1	2	2	1
450	.	f	1	3	2.5	1
450	.	f	2	1	4	3
450	.	f	2	2	3	0
450	.	f	2	3	3	0
504	.	f	1	1	0.5	0
504	.	f	1	2	1.5	0
504	.	f	1	3	1	0
504	.	f	2	1	3	2
504	.	f	2	2	0	0
504	.	f	2	3	0	0
505	.	f	1	1	0.5	0
505	.	f	1	2	0	0
505	.	f	1	3	0	0
505	.	f	2	1	0	0
505	.	f	2	2	0	0
505	.	f	2	3	0	0
512	.	f	1	1	1	0
512	.	f	1	2	1.5	0
512	.	f	1	3	1.5	0
512	.	f	2	1	1	1
512	.	f	2	2	2	1
512	.	f	2	3	1	1
556	.	f	1	1	0	0
556	.	f	1	2	0	0
556	.	f	2	1	0	0
556	.	f	2	2	0	0
556	.	f	2	3	2	0
563	.	f	1	1	2	0
563	.	f	1	2	1.5	0
563	.	f	1	3	1.5	0
563	.	f	2	1	0	0
563	.	f	2	2	0	0
563	.	f	2	3	0	0
575	.	f	1	1	1	1
575	.	f	1	2	0	1
575	.	f	1	3	1	1
575	.	f	2	1	3	0
575	.	f	2	2	2	0
584	.	f	1	1	1	0
584	.	f	2	1	0.5	0
584	.	f	2	2	0	0
584	.	f	2	3	0	0
585	.	f	1	1	0.5	0
585	.	f	2	1	3	2
585	.	f	2	2	0	0
585	.	f	2	3	0	1
598	.	f	1	1	0	0
598	.	f	1	2	0	0
598	.	f	1	3	0	0
598	.	f	2	1	1.5	2
598	.	f	2	2	2	1.5
598	.	f	2	3	2	1.5
599	.	f	1	1	2	1
599	.	f	1	2	1	0
599	.	f	1	3	2	2
599	.	f	2	1	0	1.5
599	.	f	2	2	0	0
599	.	f	2	3	0	0
839	.	f	1	1	1	0
839	.	f	1	2	1	0
839	.	f	1	3	1	0
839	.	f	2	1	1	2
839	.	f	2	2	2	1
839	.	f	2	3	1	1
851	.	f	1	1	0	0
851	.	f	1	2	0	0
851	.	f	1	3	0	0
851	.	f	2	1	0	0
851	.	f	2	2	0	0
851	.	f	2	3	0	0
895	.	f	1	1	0	0
895	.	f	1	2	1	0
895	.	f	1	3	1	0
895	.	f	2	1	1	1
895	.	f	2	2	0	1
895	.	f	2	3	1	1
925	.	f	1	1	1	0
925	.	f	1	2	1	0
925	.	f	1	3	1	0
925	.	f	2	1	2	2
925	.	f	2	2	3	1
925	.	f	2	3	1	1
1001	.	f	1	1	1	0
1001	.	f	1	2	2	2
1001	.	f	1	3	2	1
1001	.	f	2	1	2	0
1001	.	f	2	2	2	0
1001	.	f	2	3	2	1
1002	.	f	1	1	2	2
1002	.	f	1	2	2	1
1002	.	f	1	3	2	1
1002	.	f	2	1	2	2
1002	.	f	2	2	2	2
1002	.	f	2	3	2	2
1052	.	f	1	1	2	2
1052	.	f	1	2	2	2
1052	.	f	1	3	2	2
1052	.	f	2	1	2	0
1052	.	f	2	2	2	0
1052	.	f	2	3	2	0
2000	.	f	1	1	1	1
2000	.	f	1	2	0	1
2000	.	f	1	3	0	0
2000	.	f	2	1	2	0
2000	.	f	2	2	2	0
2000	.	f	2	3	2.5	0
4462	.	f	1	1	3	3
4462	.	f	1	2	2	1
4462	.	f	1	3	2	2
4462	.	f	2	1	2	2.5
4462	.	f	2	2	2	2
4462	.	f	2	3	3	2
4	.	m	1	1	0	1
4	.	m	1	2	0	0
4	.	m	1	3	1	1
4	.	m	2	1	0	0
4	.	m	2	2	0	1
4	.	m	2	3	1	3
422	.	m	1	1	2	1
422	.	m	1	2	2	1
422	.	m	1	3	2	1
422	.	m	2	1	1	1
422	.	m	2	2	1	0
422	.	m	2	3	1	1
423	.	m	1	1	2.5	1.5
423	.	m	1	2	2.5	1.5
423	.	m	1	3	2.5	1.5
423	.	m	2	1	2	1
423	.	m	2	2	2	1
423	.	m	2	3	2	2
428	.	m	1	1	3	0
428	.	m	1	2	3	0
428	.	m	1	3	3	0
428	.	m	2	1	4	2
428	.	m	2	2	4	1
428	.	m	2	3	4	1
510	.	m	1	1	1.5	0
510	.	m	1	2	2	1
510	.	m	1	3	2.5	2
510	.	m	2	1	0	0
510	.	m	2	2	3	1
510	.	m	2	3	1	0
517	.	m	1	1	1	0
517	.	m	1	2	2	0
517	.	m	1	3	1	0
517	.	m	2	1	1.5	1
517	.	m	2	2	0	0
540	.	m	1	1	1	0
540	.	m	1	2	2	0
540	.	m	1	3	2	0
540	.	m	2	1	1	0
540	.	m	2	2	0	0
557	.	m	1	1	2	1
557	.	m	1	2	2	1
557	.	m	1	3	2	0
557	.	m	2	1	2	2
557	.	m	2	2	2.5	2
557	.	m	2	3	2.5	1.5
560	.	m	1	1	0	0
560	.	m	1	2	0	0
560	.	m	2	1	0	0
560	.	m	2	2	0	0
560	.	m	2	3	0	0
561	.	m	1	1	3	1
561	.	m	1	2	2	0
561	.	m	1	3	1	0
561	.	m	2	1	2.5	1
561	.	m	2	2	2.5	1
561	.	m	2	3	2.5	1
570	.	m	1	1	1	0
570	.	m	1	2	2.5	1.5
570	.	m	1	3	1	1
570	.	m	2	1	2	2
570	.	m	2	2	2	1
570	.	m	2	3	1	0
587	.	m	1	1	2	2
587	.	m	1	2	3.5	2
587	.	m	1	3	3	1.5
587	.	m	2	1	3	1
587	.	m	2	2	3	2.5
587	.	m	2	3	2.5	1
597	.	m	1	1	1.5	0
597	.	m	2	1	2	0
597	.	m	2	2	0.5	0
597	.	m	2	3	1	0
818	.	m	1	1	2	0
818	.	m	1	2	2	2
818	.	m	1	3	2	1
818	.	m	2	1	3	2
818	.	m	2	2	3	3
818	.	m	2	3	3	2
852	.	m	1	1	1	1
852	.	m	1	2	1	1
852	.	m	1	3	0	1
852	.	m	2	1	2	1
852	.	m	2	2	1	0
852	.	m	2	3	2	1
879	.	m	1	1	2	2
879	.	m	1	2	2	2
879	.	m	1	3	2	2
879	.	m	2	1	2	1
879	.	m	2	2	2	2
879	.	m	2	3	3	2
1051	.	m	1	1	2	1
1051	.	m	1	2	2	1
1051	.	m	1	3	2	2
1051	.	m	2	1	3	3
1051	.	m	2	2	3	2
1051	.	m	2	3	3	3

## Sheet: nestling_data_raw_ADULTSONLY
ring	sex	day5or7	trial	tongue_movements	head_movements
429	f	1	1	1.5	1
429	f	1	2	1.5	1
429	f	1	3	2	1
429	f	2	1	2	0
429	f	2	2	2	0
429	f	2	3	2	0
435	f	1	1	2	1
435	f	1	2	2	0
435	f	1	3	1	0
435	f	2	1	1	0
435	f	2	2	1	0
435	f	2	3	1	1
436	f	1	1	2	2
436	f	1	2	1.5	0
436	f	1	3	2	0
436	f	2	1	2	2
436	f	2	2	3	2
436	f	2	3	3	2
438	f	1	1	3	2
438	f	1	2	3.5	1
438	f	1	3	3	2
438	f	2	1	1	1
438	f	2	2	3	2
438	f	2	3	2.5	1
445	f	1	1	2	2
445	f	1	2	2	2
445	f	1	3	2	1.5
445	f	2	1	1	0.5
445	f	2	2	2	2
445	f	2	3	2	2
447	f	1	1	0	0
447	f	1	2	1.5	0
447	f	1	3	1	0
447	f	2	1	2	0
447	f	2	2	0	0
447	f	2	3	1	0
461	f	1	1	3	2.5
461	f	1	2	2	0
461	f	1	3	0	0
461	f	2	1	1	0
461	f	2	2	0	1
461	f	2	3	1	0
464	f	1	1	3.5	2
464	f	1	2	1	2
464	f	1	3	1	0
464	f	2	1	0	0
464	f	2	2	0	0
464	f	2	3	1	0
506	f	1	1	0	0
506	f	1	2	0	0
506	f	1	3	0	0
506	f	2	1	1.5	1.5
506	f	2	2	1.5	0
506	f	2	3	2	0
508	f	1	1	0	0
508	f	1	2	2	1
508	f	1	3	1	0
508	f	2	1	3	0
508	f	2	2	1.5	0
508	f	2	3	2	0
509	f	1	1	0	2
509	f	1	2	4	2
509	f	1	3	2	3
509	f	2	1	2	0
509	f	2	2	2	2
509	f	2	3	3	2.5
558	f	1	1	0.5	0
558	f	1	2	0.5	1
558	f	2	1	1	0
558	f	2	2	0	0
558	f	2	3	1	0
559	f	1	1	0	0
559	f	1	2	0	0
559	f	2	1	0	0
559	f	2	2	0	0
559	f	2	3	0	0
566	f	1	1	0	0
566	f	1	2	0	0
566	f	1	3	0	0
566	f	2	1	1.5	0
566	f	2	2	1.5	0
566	f	2	3	1.5	0
571	f	1	1	3	0
571	f	1	2	2	0
571	f	1	3	1.5	1
571	f	2	1	1.5	0
571	f	2	2	3	2
571	f	2	3	0	0
575	f	1	1	1	1
575	f	1	2	0	1
575	f	1	3	1	1
575	f	2	1	3	0
575	f	2	2	2	0
595	f	1	1	0	0
595	f	1	2	1	0
595	f	1	3	0	0
595	f	2	1	0	0
595	f	2	2	0	0
595	f	2	3	0	0
862	f	1	1	1	1
862	f	1	2	1	0
862	f	1	3	1	0
862	f	2	1	3	2
862	f	2	2	3	2
862	f	2	3	2	1
863	f	1	1	1	1
863	f	1	2	1	1
863	f	1	3	0	0
863	f	2	1	2	2
863	f	2	2	2	2
863	f	2	3	3	2
864	f	1	1	0	0
864	f	1	2	0	0
864	f	1	3	0	0
864	f	2	1	2	0
864	f	2	2	2	1
864	f	2	3	2	1
884	f	1	1	2	0
884	f	1	2	2	1
884	f	1	3	2	0
884	f	2	1	1	0
884	f	2	2	1	0
884	f	2	3	2	0
910	f	1	1	1	0
910	f	1	2	0	0
910	f	1	3	2	1
910	f	2	1	1	1
910	f	2	2	2	2
910	f	2	3	1	2
427	m	1	1	2.5	1
427	m	1	2	2.5	1
427	m	1	3	2.5	1
427	m	2	1	2	1
427	m	2	2	1	0
427	m	2	3	1	0
431	m	1	1	1	0
431	m	1	2	0	0
431	m	1	3	0	0
431	m	2	1	1	0
431	m	2	2	2	1
431	m	2	3	0	0
432	m	1	1	0	0
432	m	1	2	1	0
432	m	1	3	0	0
432	m	2	1	0	0
432	m	2	2	0	0
432	m	2	3	0	0
433	m	1	1	0	0
433	m	1	2	2	2
433	m	1	3	0	2
433	m	2	1	0	0
433	m	2	2	0	0
433	m	2	3	0	0
440	m	1	1	3	1
440	m	1	2	3	3
440	m	1	3	2.5	1
440	m	2	1	2	1
440	m	2	2	2.5	2
440	m	2	3	2	0
441	m	1	1	2	1
441	m	1	2	2	1
441	m	1	3	2	1
441	m	2	1	3	2
441	m	2	2	3	2
441	m	2	3	3	1
448	m	1	1	2.5	2
448	m	1	2	3.5	3
448	m	1	3	3	2
448	m	2	1	4	3
448	m	2	2	4	3
448	m	2	3	3	2
449	m	1	1	1	0
449	m	1	2	1	0
449	m	1	3	1.5	0
449	m	2	1	2	0
449	m	2	2	3	1.5
449	m	2	3	2	0
451	m	1	1	2	2
451	m	1	2	3.5	2.5
451	m	1	3	3	2
451	m	2	1	3	1
451	m	2	2	2.5	0.5
451	m	2	3	2.5	1
463	m	1	1	2	0.5
463	m	1	2	2	1
463	m	1	3	2	0
463	m	2	1	0	0
463	m	2	2	0	0
463	m	2	3	1	0
466	m	1	1	2	2
466	m	1	2	1.5	0
466	m	1	3	0	0
466	m	2	1	1.5	0
466	m	2	2	1.5	0
466	m	2	3	1.5	0
507	m	1	1	0	0
507	m	1	2	2	0
507	m	1	3	1	0
507	m	2	1	3	1
507	m	2	2	2.5	0
507	m	2	3	3	1
551	m	1	1	0	0
551	m	1	2	3	0
551	m	1	3	0	0
551	m	2	1	2.5	1.5
551	m	2	2	0	0
551	m	2	3	3	0
562	m	1	1	1	0
562	m	1	2	1.5	0
562	m	1	3	1.5	0
562	m	2	1	1	0
562	m	2	2	2	1
562	m	2	3	0	1
568	m	1	1	2	0
568	m	1	2	2	0
568	m	1	3	2	1
568	m	2	1	3.5	2
568	m	2	2	3.5	2
568	m	2	3	3.5	2
569	m	1	1	1.5	2
569	m	1	2	1.5	2
569	m	1	3	1	1
569	m	2	1	3	2.5
569	m	2	2	3	2
569	m	2	3	2	2.5
572	m	1	1	2	1
572	m	1	2	1	0
572	m	1	3	1	1
572	m	2	1	1	1
572	m	2	2	2	2
572	m	2	3	0	0
573	m	1	1	2.5	2
573	m	1	2	2	2
573	m	1	3	2.5	2
573	m	2	1	0	0
573	m	2	2	1.5	0
574	m	1	1	1	1
574	m	1	2	1	1
574	m	1	3	0	1
574	m	2	1	3	3
574	m	2	2	3	3
583	m	1	1	2	0
583	m	1	2	1	0
583	m	1	3	1	0
583	m	2	1	0.5	0
583	m	2	2	1.5	0
583	m	2	3	2	0
586	m	1	1	2.5	1
586	m	2	1	0.5	0
586	m	2	2	1.5	0
586	m	2	3	1	0
588	m	1	1	2.5	2
588	m	1	2	2	1
588	m	1	3	2	2
588	m	2	1	3	2
588	m	2	2	3	2
588	m	2	3	3	2
589	m	1	1	0	0
589	m	1	2	0	0
589	m	2	1	0	0
589	m	2	2	0	0
589	m	2	3	0	0
590	m	1	1	0	0
590	m	1	2	0	0
590	m	2	1	0	0
590	m	2	2	0	0
590	m	2	3	1.5	0
596	m	1	1	2	2
596	m	1	2	2	2
596	m	1	3	2	2
596	m	2	1	2	1
596	m	2	2	2	1.5
596	m	2	3	0	1.5
894	m	1	1	0	0
894	m	1	2	1	1
894	m	1	3	2	1
894	m	2	1	2	2
894	m	2	2	2	2
894	m	2	3	1	1
926	f	1	1	2.5	2
926	f	1	2	2.5	3
926	f	1	3	2.5	1
926	f	2	1	3	2
926	f	2	2	3	1
926	f	2	3	3	2
1053	m	1	1	2	1
1053	m	1	2	2	1
1053	m	1	3	2	1
1053	m	2	1	1	0
1053	m	2	2	2	1
1053	m	2	3	1	0

## Sheet: adult_dataset
bird_id	sex	yes	cage	adult_activity_mmps	foster	gen	tongue_movements_mean	head_movements_mean	adult_tarsus	mass_28thmay
429	F	0	.	.	157	157	1.83333	0.5	.	.
435	F	1	15	6.24242	167b	269	1.33333	0.333333	13	15.4
438	F	1	8	4.71212	155	169	2.66667	1.5	13.8	17.9
445	F	1	3	8.5303	42	169	1.83333	1.66667	14.3	13.8
447	F	1	2	8.06061	42	160	0.916667	0	15	20.9
461	F	0	.	.	8b	2	1.16667	0.583333	.	.
464	F	0	.	.	8b	268	1.08333	0.666667	.	.
465	F	0	.	7.07576	.	.	.	.	14	15.7
506	F	1	21	4.25758	2	31	0.833333	0.25	15.2	18
508	F	1	27	4.60606	31	46	1.58333	0.166667	13.9	13.2
509	F	1	9	10.5	31	2	2.16667	1.91667	14.4	16.6
552	F	0	.	6.10606	.	.	.	.	14.3	15.5
558	F	1	11	0.68182	131	6	0.583333	0.25	13.3	16.7
559	F	1	35	5.18182	131	46	0	0	14.2	15.1
564	F	0	.	6.24242	.	.	.	.	13.8	15
565	F	0	.	10.1667	.	.	.	.	14.2	17.4
566	F	1	32	1.77273	184	125	0.75	0	14.6	16.7
571	F	1	23	2.72727	128	177	1.83333	0.5	14	15.4
595	F	1	5	6	46	22	0.166667	0	14.6	17.8
829	F	0	.	.	.	.	.	.	.	.
850	F	0	.	.	.	.	.	.	13.7	16.3
862	F	1	24	1.01515	24	24	1.83333	1	14.5	16.2
867	F	0	.	6.07576	.	.	.	.	14.6	16.3
910	F	1	14	0.21212	267	267	1.16667	1	14.4	14.7
926	F	1	29	2.54545	146	146	2.75	1.83333	13.4	16.6
1053	F	1	44	8.65152	260	260	1.66667	0.666667	14.3	13.7
427	M	1	8	15.2121	157	128	1.91667	0.666667	14.3	13.2
431	M	1	11	2.60606	184b	269	0.666667	0.166667	13.4	18.6
432	M	1	26	1.86364	184b	25	0.166667	0	14	17.3
433	M	1	14	0.63636	184b	269	0.333333	0.666667	14.3	19.9
436	M	0	.	.	167b	270	2.25	1.33333	15	15.1
440	M	0	.	.	155	169	2.5	1.33333	.	.
441	M	0	.	.	255	255	2.5	1.33333	.	.
448	M	1	27	4.98485	155	42	3.33333	2.5	12.8	15.9
449	M	0	.	.	255	125	1.75	0.25	14.1	19.2
451	M	0	.	.	42	25	2.75	1.5	.	.
463	M	1	32	7.0303	15	135	1.16667	0.25	.	14.1
466	M	1	2	5.48485	8b	8	1.33333	0.333333	15.1	18.1
507	M	1	24	3.28788	31	57	1.91667	0.333333	14.2	18.6
551	M	1	9	5.68182	46	8	1.41667	0.25	14	17.2
553	M	0	.	3.24242	.	.	.	.	14.8	16.8
562	M	1	15	9.72727	151	177	1.16667	0.333333	15.1	15.9
568	M	0	.	.	184	258	2.75	1.16667	14.6	13.3
569	M	1	41	8.09091	128	177	2	2	13.9	13.3
572	M	1	29	6.51515	128	155	1.16667	0.833333	15	12.8
573	M	0	.	.	149	146	1.54167	1	.	.
574	M	1	18	10.0152	149	177	1.83333	2	14.5	14.5
575	M	0	.	.	149	258	1.58333	0.5	14.3	13
583	M	0	.	.	8	8	1.33333	0	14.6	18.5
586	M	0	.	.	19	31	1.75	0.5	15.2	16.6
588	M	1	38	12.6515	31	258	2.58333	1.83333	14.3	12.6
589	M	0	.	.	143	270	0	0	13.5	17.7
590	M	1	21	3.78788	143	8	0.25	0	14.2	13.2
596	M	0	.	.	8	258	1.66667	1.66667	14.3	12.2
847	M	0	.	5.62121	.	.	.	.	13.8	14.5
863	M	1	44	4.06061	267	267	1.5	1.33333	14	15.8
864	M	1	5	2.12121	24	24	1	0.333333	14.9	16.8
884	M	1	17	4.15152	260	260	1.66667	0.166667	14.8	19.3
894	M	1	35	5.25758	267	267	1.33333	1.16667	14.3	14.8
